# Supplementary material for: Negativity Bias in Dangerous Drivers
Source: PLoS One. 2016 Jan 14;11(1):e0147083. doi: 10.1371/journal.pone.0147083 (PMC4713152; doi:10.1371/journal.pone.0147083)
Supplement: S1 File — (XLSX) [file pone.0147083.s001.xlsx]

## Sheet: Sheet1
subject	type	gender	age	drivingyear	mileage	pic_Neu_acc	pic_Neu_rt	pic_negative_acc	pic_negative_rt	stroop	DDDI	NE	AD	RD	DD	point	crashes
1	1	1	44	12	20	1	650.25	0.97	677.08	26.83	56	21	10	25	3	0	1
2	2	1	31	5	20	1	1084.08	1	1487.4	403.32	74	25	18	31	3	9	5
3	1	1	35	13	10	0.97	555.41	0.97	515.87	-39.54	55	17	15	23	3	0	2
4	1	1	38	13	20	0.95	566.32	1	535.58	-30.74	67	20	14	33	2	0	0
5	1	1	42	5	4	1	842.51	0.97	838.89	-3.62	54	20	9	25	3	0	0
6	2	1	23	6	4.5	0.95	591.89	0.95	669.66	77.77	104	33	24	47	5	9	9
7	1	1	50	18	2	0.95	504.71	0.97	492.08	-12.63	71	27	16	28	2	0	1
8	2	2	28	3.5	4	1	515.83	1	528.52	12.69	68	22	13	33	3	6	3
9	2	1	30	5	10	0.97	534.13	0.97	536.85	2.72	82	25	19	38	7	9	4
10	1	2	32	4	5	0.97	550.28	0.95	569.58	19.3	52	19	12	21	2	3	1
11	2	2	36	8	3	0.93	573.27	0.93	633.81	60.54	80	33	13	34	2	9	5
12	2	1	31	8	7	1	426.13	0.95	442.61	16.48	71	24	17	30	4	9	5
13	2	1	24	3	15	0.97	497.38	0.95	502.74	5.36	54	19	8	27	2	6	2
14	1	2	35	12	2	1	506.05	0.97	478.87	-27.18	66	23	16	27	2	0	0
15	1	2	44	10	5	0.97	458.62	1	480	21.38	63	26	13	24	2	0	1
16	2	1	28	3	2	1	679.8	1	711.05	31.25	119	27	18	45	7	9	2
17	2	2	38	10	15	1	556.95	1	587.15	30.2	108	27	15	33	5	6	3
18	2	2	34	9	2	0.95	492.89	1	534.83	41.94	133	37	18	43	5	9	10
19	1	2	33	3	5	1	612.18	0.97	588.84	-23.34	79	17	7	18	2	0	3
20	1	2	34	3	2	1	649.4	0.95	660.45	11.05	82	23	13	19	2	0	9
21	2	2	36	4	6	0.97	646.9	1	700.8	53.9	120	31	19	39	4	6	5
22	2	1	30	4	3	1	622.33	0.97	648.36	26.03	38	15	10	13	2	9	3
23	1	1	33	6	5	1	508.4	1	559.1	50.7	45	15	13	17	2	0	2
24	1	1	26	4	3	0.97	472.72	0.97	480.82	8.1	42	16	14	12	2	0	0
25	1	1	25	3	3.4	0.88	443.06	0.95	447.42	4.36	81	32	15	34	2	0	1
26	1	2	35	6	6	1	574.85	0.97	599.31	24.46	59	26	8	25	4	0	0
27	1	1	30	5	15	0.97	563.59	0.97	559.31	-4.28	61	21	9	31	4	3	1
28	2	1	32	3	5	1	647.08	1	618.42	-28.66	59	24	12	23	2	6	2
29	2	1	22	3	1	0.97	958.13	1	1127.94	169.81	55	20	12	23	2	6	0
30	2	1	27	5	5	0.95	515.5	0.93	510.38	-5.12	75	25	15	35	6	15	5
31	1	1	29	8	12	1	432.43	0.95	463.76	31.33	62	23	17	22	2	0	0
32	2	2	25	4	10	0.95	445.63	0.97	459.41	13.78	73	25	16	32	6	6	3
33	2	2	29	9	9	0.95	545.45	0.93	614.47	69.02	60	28	10	22	3	8	3
34	1	1	25	4	5	0.93	493.81	1	606.25	112.44	63	23	18	22	3	3	2
35	1	2	26	3	3	0.97	487.21	1	505.38	18.17	42	18	9	15	2	0	2
36	1	2	36	7	12.5	1	560.45	1	599.25	38.8	48	19	10	19	2	0	0
37	1	1	24	5	2	1	565.7	0.93	603.84	38.14	60	21	14	25	2	2	3
38	1	1	30	7	17	0.97	673.85	0.95	694.11	20.26	57	22	10	25	2	0	1
39	1	2	34	5	4	1	464.5	0.97	511.36	46.86	51	22	10	19	2	0	2
40	1	2	33	4	6	0.93	527.16	0.97	541.69	14.53	55	23	11	21	2	3	2
41	1	2	25	4	5	1	499.32	0.97	504.77	5.45	50	20	12	18	2	0	1
42	2	2	36	3	2	1	591.95	0.97	640.23	48.28	80	30	19	31	2	6	4
